# Supplementary material for: Association of Circulating Platelet Extracellular Vesicles and Pulse Wave Velocity with Cardiovascular Risk Estimation
Source: MDPI journal article supplement (doi:10.3390/ijms231810524), 2022-09-10
Supplement: s1 [file s1]

## Supplementary material

**Table S1. Cardiovascular risk categories according to age thresholds**

|                                 | <50 years    | 50-69 years | ≥70 years   |
|---------------------------------|--------------|-------------|-------------|
| <b>Low to moderate CVD risk</b> | <2.5%        | <5%         | <7.5%       |
| <b>High CVD risk</b>            | 2.5 to <7.5% | 5 to <10%   | 7.5 to <15% |
| <b>Very high CVD risk</b>       | ≥7.5%        | ≥10%        | ≥15%        |

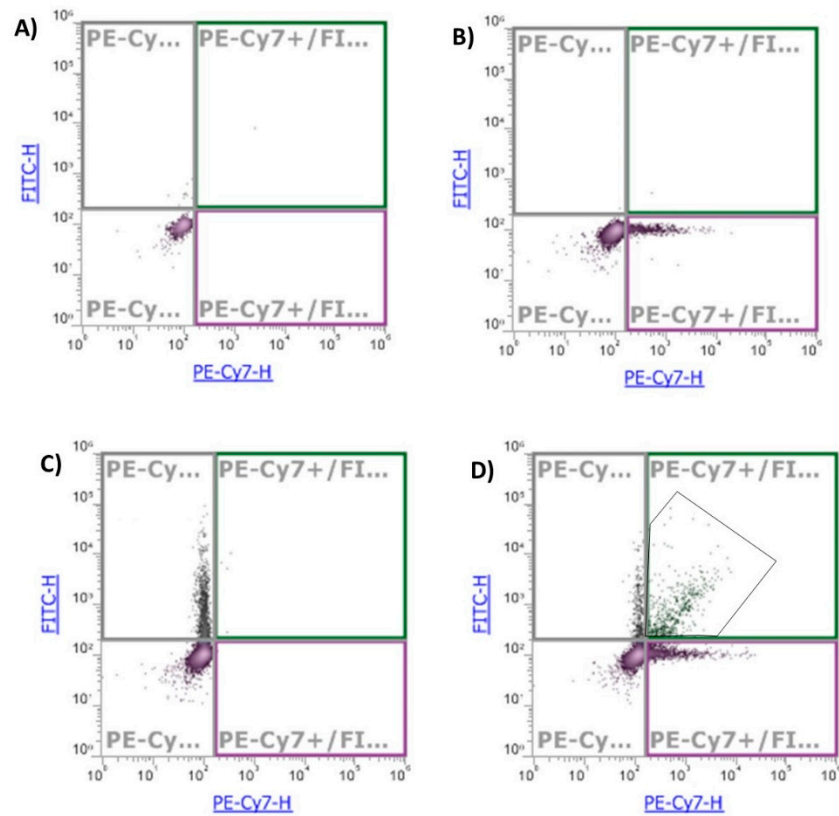

**Figure S1. Gating and acquisition strategy for the detection of circulating extracellular vesicles with flow cytometry. A) Buffer only. B) CD41-PE Cy7 single stain. C) Annexin V-FITC single stain. D) Double staining with CD41-PE Cy7 and Annexin V-FITC.**
